# Supplementary material for: A sequentially responsive and structure-transformable nanoparticle with a comprehensively improved ‘CAPIR cascade’ for enhanced antitumor effect
Source: Royal Society of Chemistry journal article supplement (doi:10.1039/c8nr08781d), 2018-12-11
Supplement: c8nr08781d1.pdf [file c8nr08781d1.pdf]

## Supplementary Information

### **A Sequentially Responsive and Structure-transformable Nanoparticle with Comprehensively Improved ‘CAPIR cascade’ for Enhanced Antitumor Effect**

Chenfeng Xu <sup>a</sup>, Yu Sun <sup>b</sup>, YulinYu <sup>a</sup>, Mei Hu <sup>a</sup>, Conglian Yang <sup>a</sup>, Zhiping Zhang <sup>a, c, d</sup>,

\*

#### AUTHOR ADDRESS

<sup>a</sup> Tongji School of Pharmacy, Huazhong University of Science and Technology,  
Wuhan 430030, China

<sup>b</sup> Ningbo First Hospital, Ningbo 315010, China.

<sup>c</sup> National Engineering Research Center for Nanomedicine, Huazhong University of  
Science and Technology, Wuhan 430030, China

<sup>d</sup> Hubei Engineering Research Centre for Novel Drug Delivery System, Huazhong  
University of Science and Technology, Wuhan 430030, China

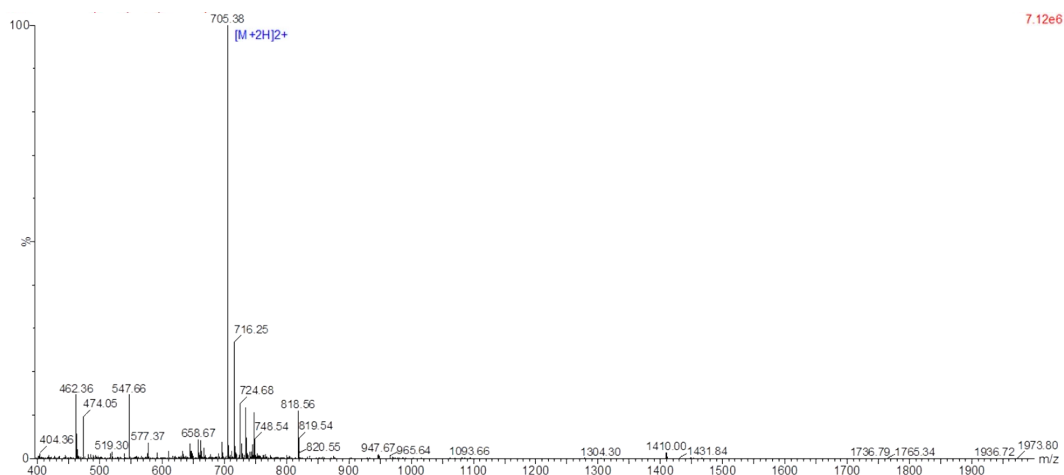

**Fig.S1** The HRMS spectrum of 2-(Nap)-FFKAGLDD-RGD.

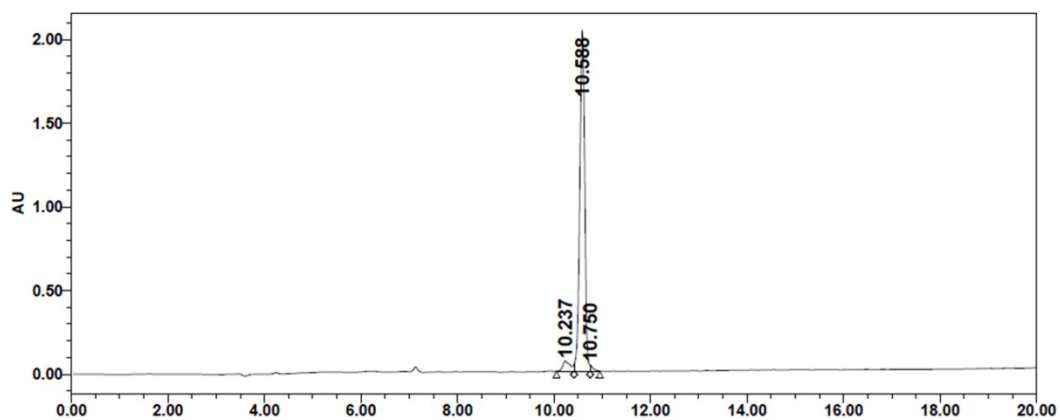

**Fig.S2** The HPLC spectrum of 2-(Nap)-FFKAGLDD-RGD, purify is 94.76%.

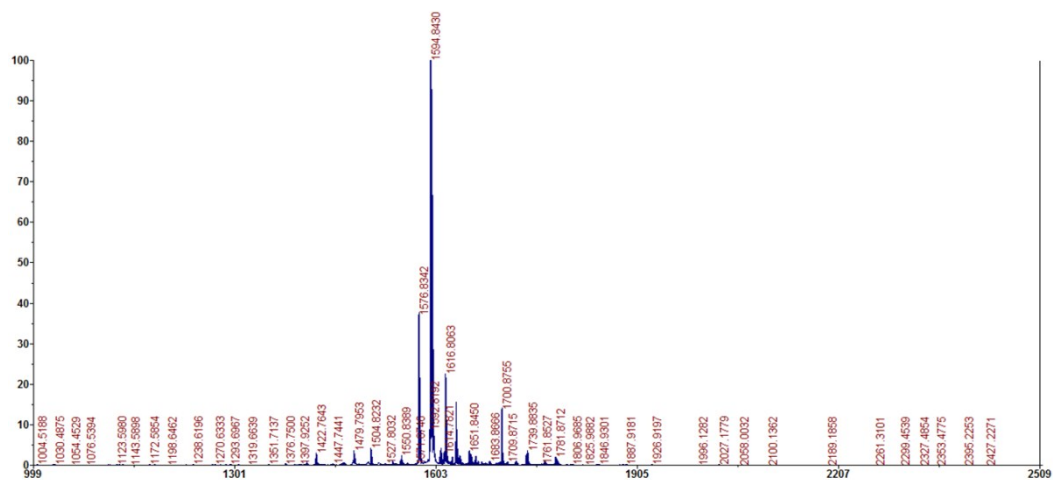

**Fig.S3** The HRMS spectrum of 2-(Nap)-FFKWGLWD-RGD.



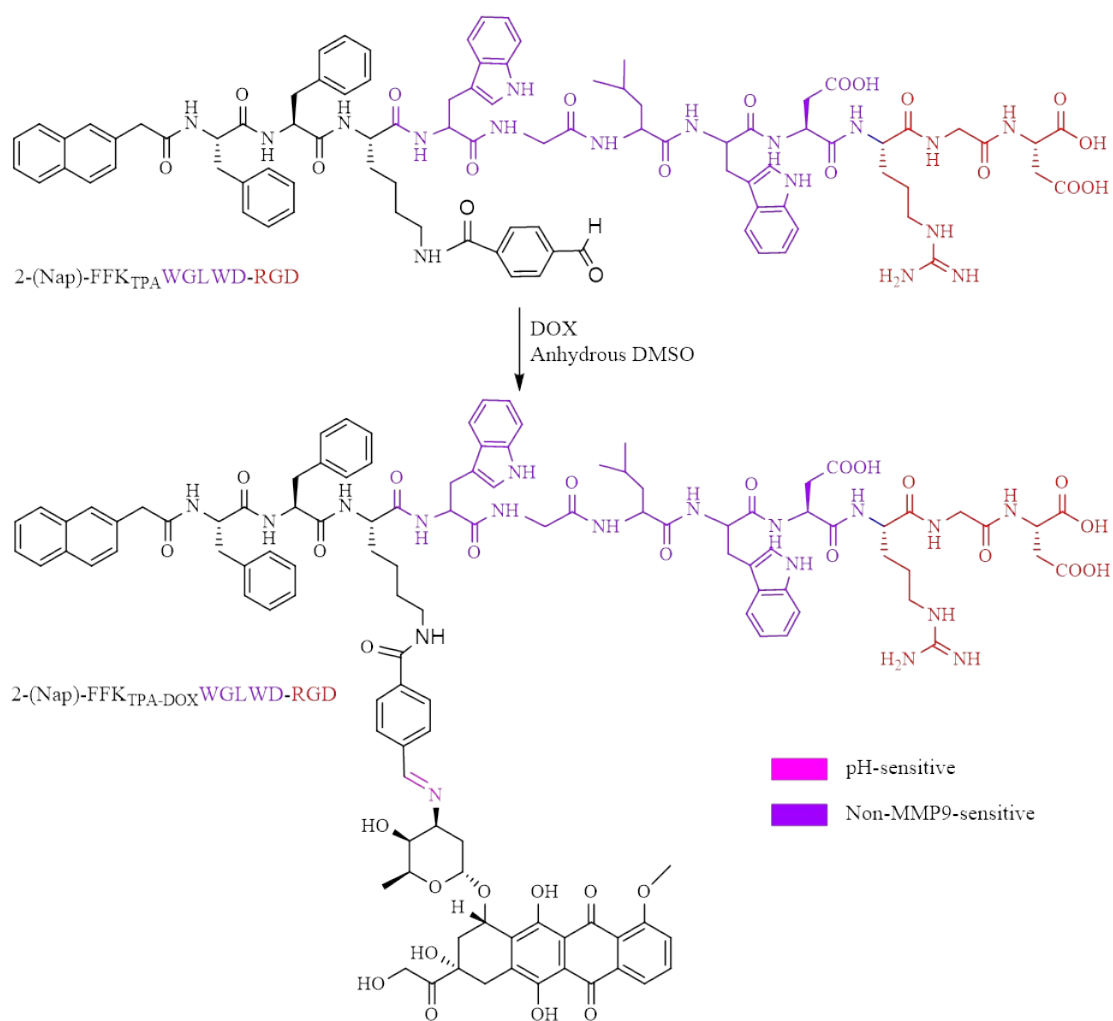

**Fig.S6** Synthesis route of 2-(Nap)-FFK<sub>TPA-DOX</sub>WGLWD-RGD (compound 2).

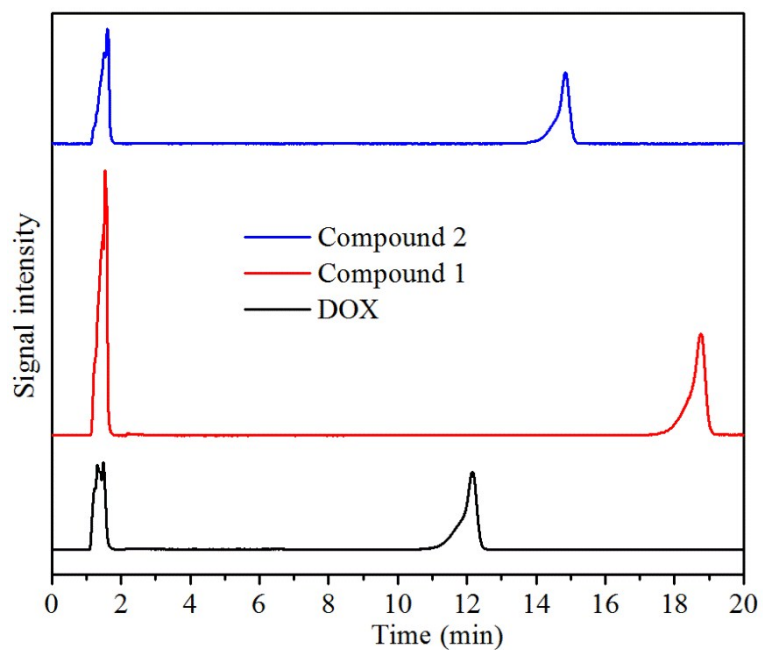

**Fig.S7** The HPLC spectra of DOX, 2-(Nap)-FFK<sub>TPA-DOX</sub>AGLDD-RGD (compound 1) and 2-(Nap)-FFK<sub>TPA-DOX</sub>WGLWD-RGD (compound 2).

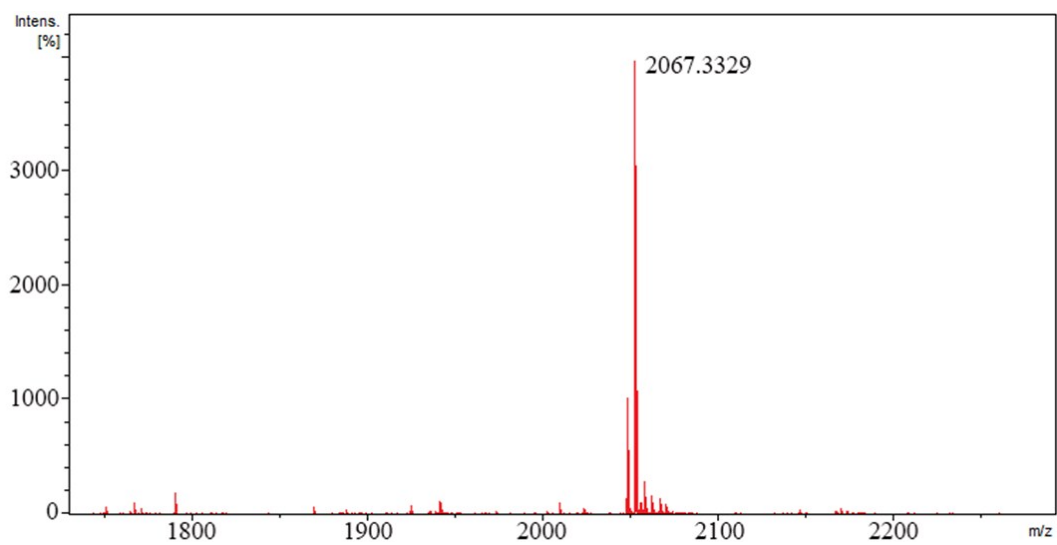

**Fig.S8** The HRMS spectrum of 2-(Nap)-FFK<sub>TPA-DOX</sub>AGLDD-RGD (compound 1).

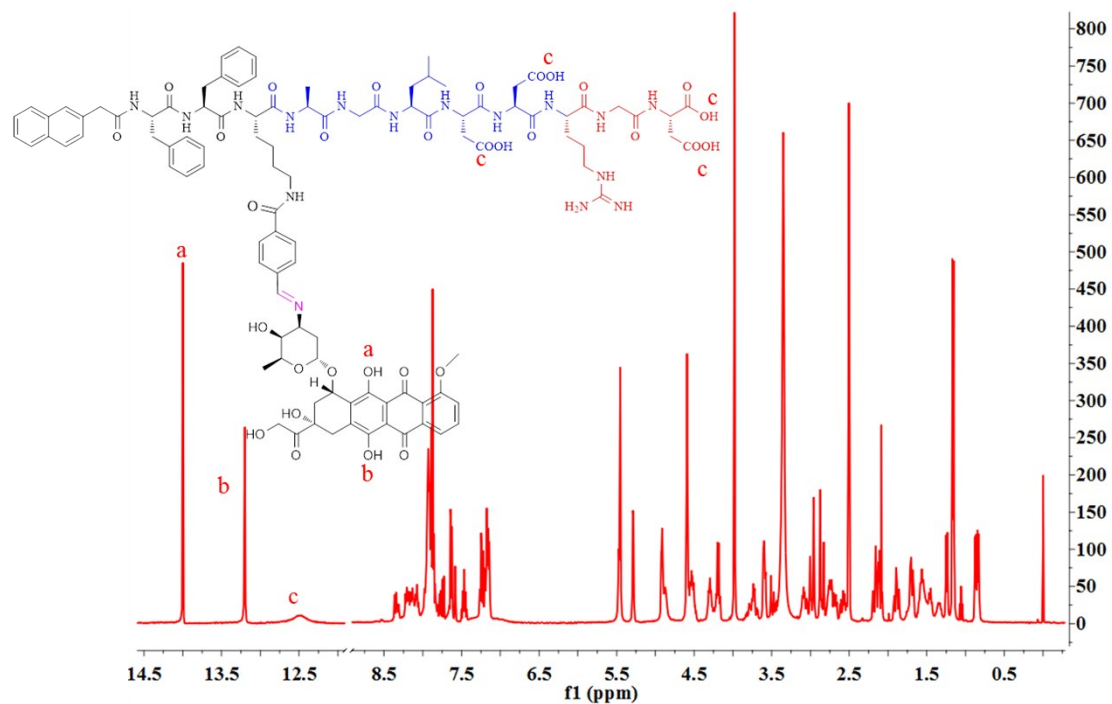

**Fig.S9** The  $^1\text{H-NMR}$  spectrum of 2-(Nap)-FFK<sub>TPA-DOX</sub>AGLDD-RGD (compound 1, 400 MHz, *d6*-DMSO).

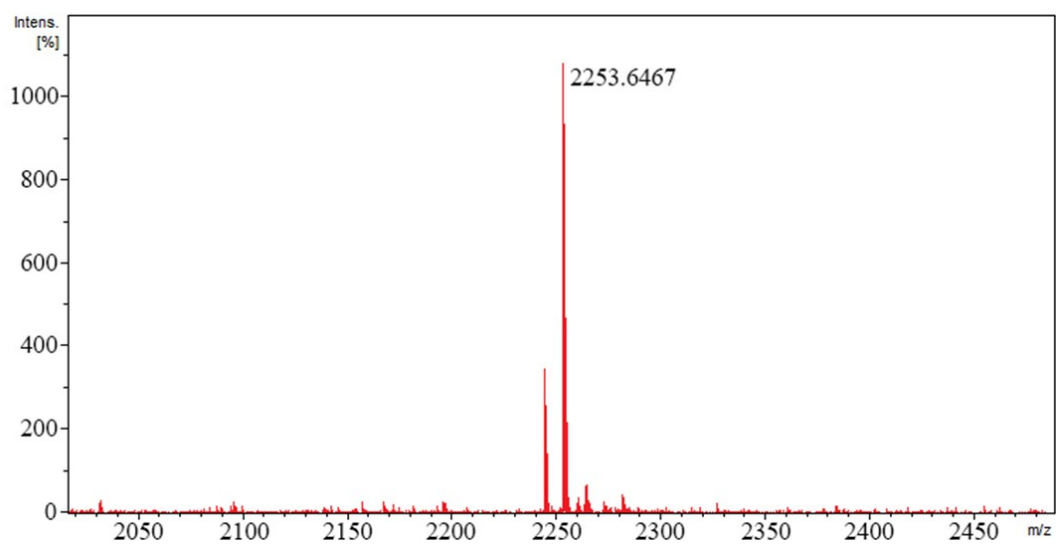

**Fig.S10** The HRMS spectrum of 2-(Nap)-FFK<sub>TPA-DOX</sub>WGLWD-RGD (compound 2).

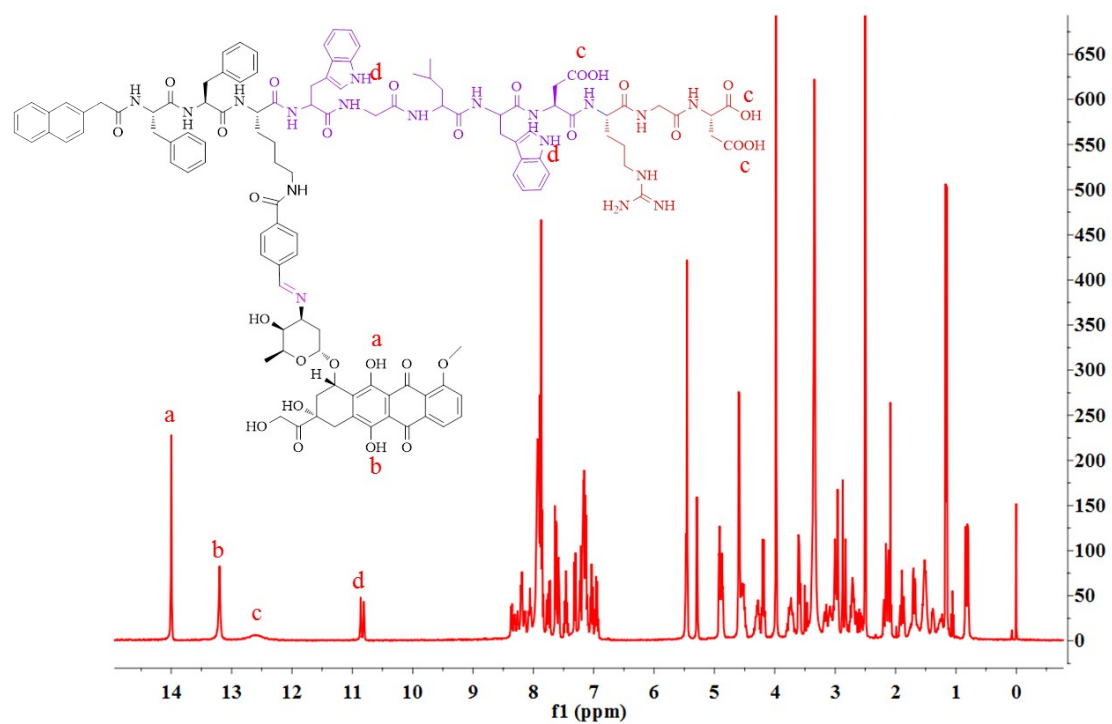

**Fig.S11** The  $^1\text{H-NMR}$  spectrum of 2-(Nap)-FFK<sub>TPA-DOX</sub>WGLWD-RGD (compound 2, 400 MHz, *d*<sub>6</sub>-DMSO).

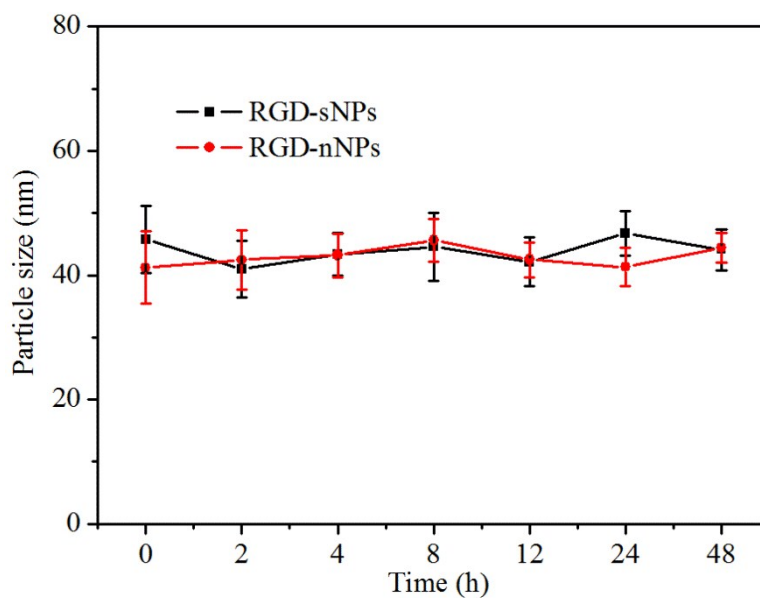

**Fig.S12** The stability of RGD-sNPs and RGD-nNPs in PBS (pH7.4) containing 10% FBS at 37 °C for 48 h.

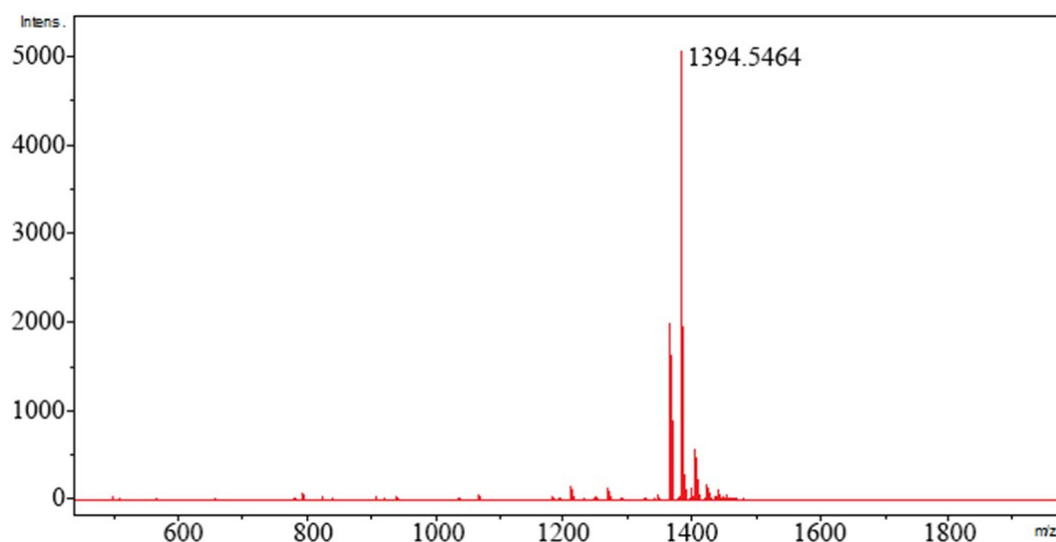

**Fig.S13** The HRMS spectrum of intermediate generated from compound 1 that was treated for 12 h with MMP9, and the intermediate was determined as 2-(Nap) - FFK<sub>TPA-DOXAG</sub> according to the molecular weight, HRMS (ESI) m/z: ([M+H]<sup>+</sup>) calcd for C<sub>76</sub>H<sub>79</sub>N<sub>7</sub>O<sub>19</sub>, 1394.4760; found 1394.5464.

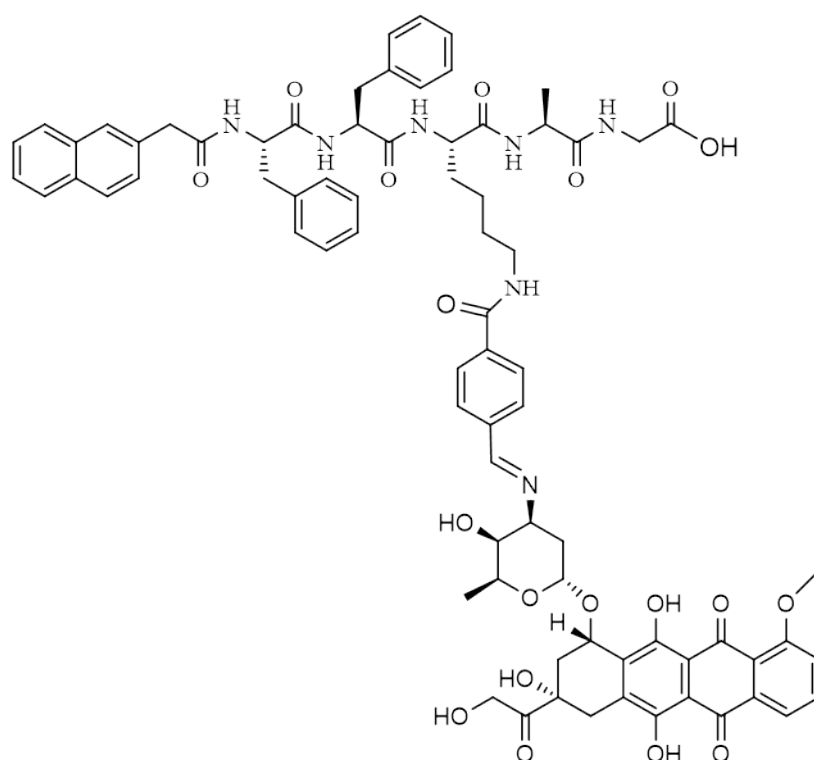

**Fig.S14** The chemical structure of 2-(Nap)-FFK<sub>TPA-DOXAG</sub>.



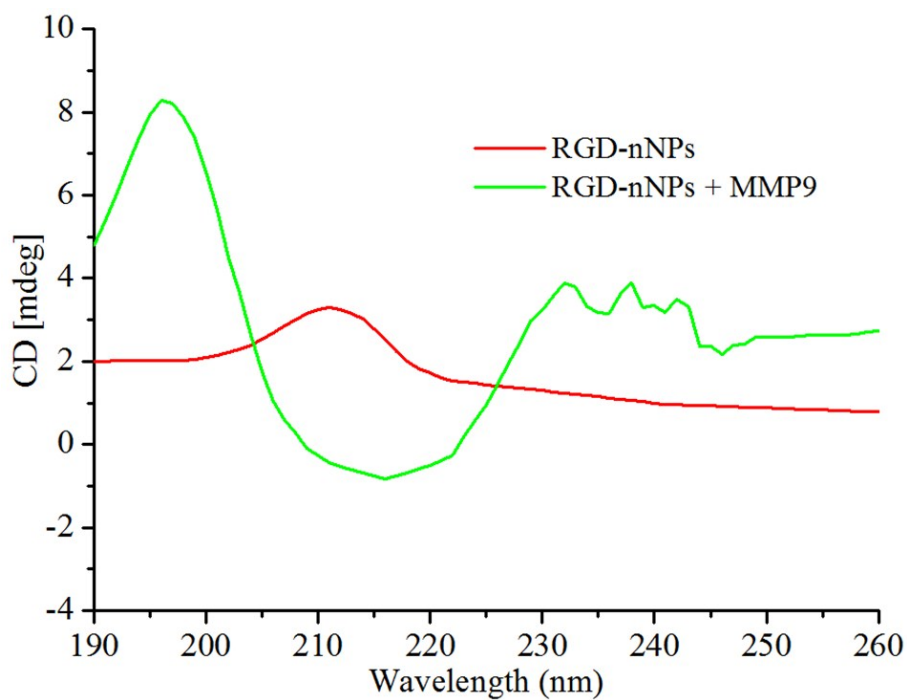

**Fig.S15** The CD spectra of RGD-nNPs with or without MMP9 treatment.

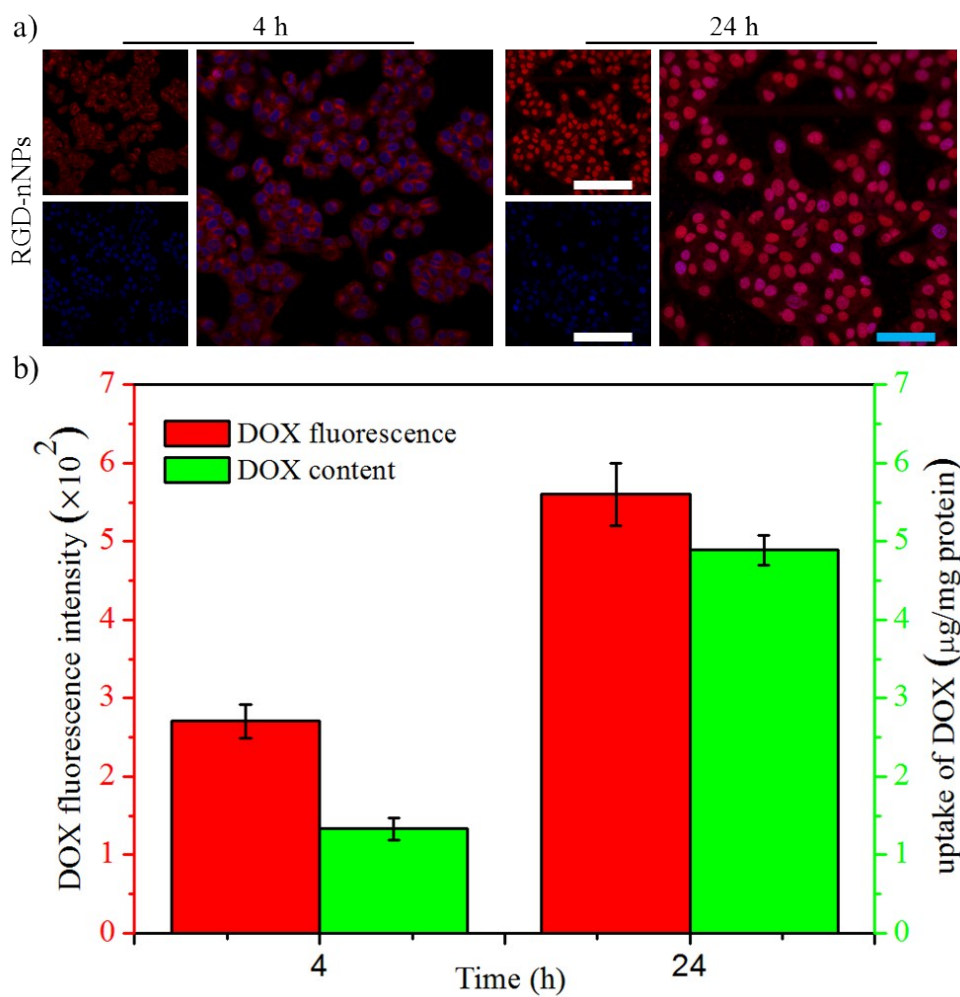

**Fig.S16** Cellular uptake in HepG2 cells treated with RGD-nNPs. a) Confocal laser scanning microscope (CLSM) images of cellular uptake in HepG2 cells incubated with RGD-nNPs for 4 h or 24 h (white scale bar for 100  $\mu\text{m}$  and blue scale for 50  $\mu\text{m}$ ), respectively. b) Quantitative analysis of DOX fluorescence intensity by flow cytometer and the amount of DOX internalized by HepG2 cells determined by HPLC (n=3).

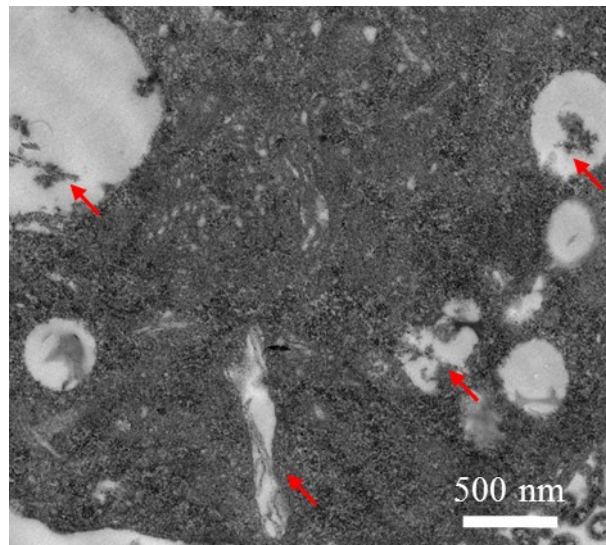

**Fig.S17** Bio-TEM of HepG2 cells incubated with pretreated RGS-sNPs (pretreated MMP9 for 12 h) for 2 h (red arrows represent nanofibers in vessels or lysosomes).

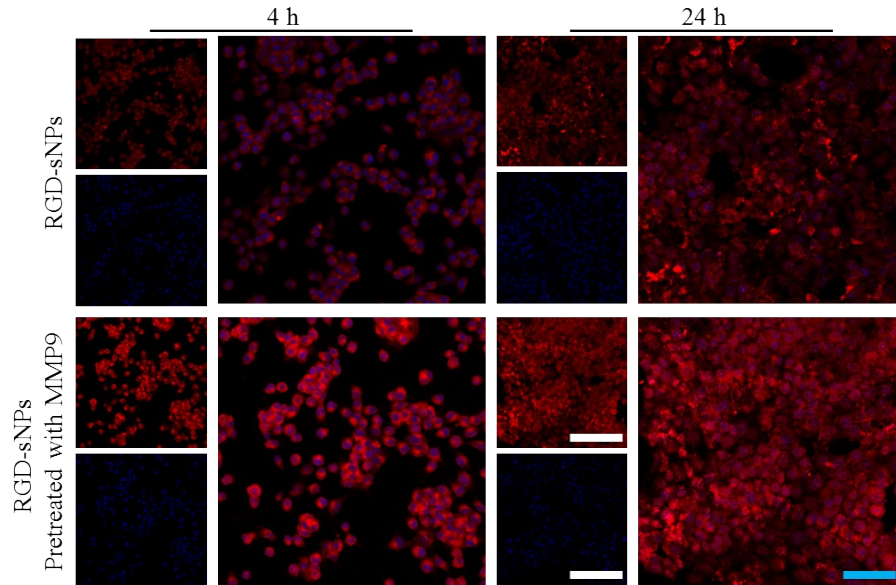

**Fig.S18** Cellular uptake in 4T1 cells treated with RGD-sNPs or RGS-sNPs (pretreated MMP9 for 12 h) for 4 h and 24 h (white scale bar for 100 μm and blue scale for 50 μm), respectively.

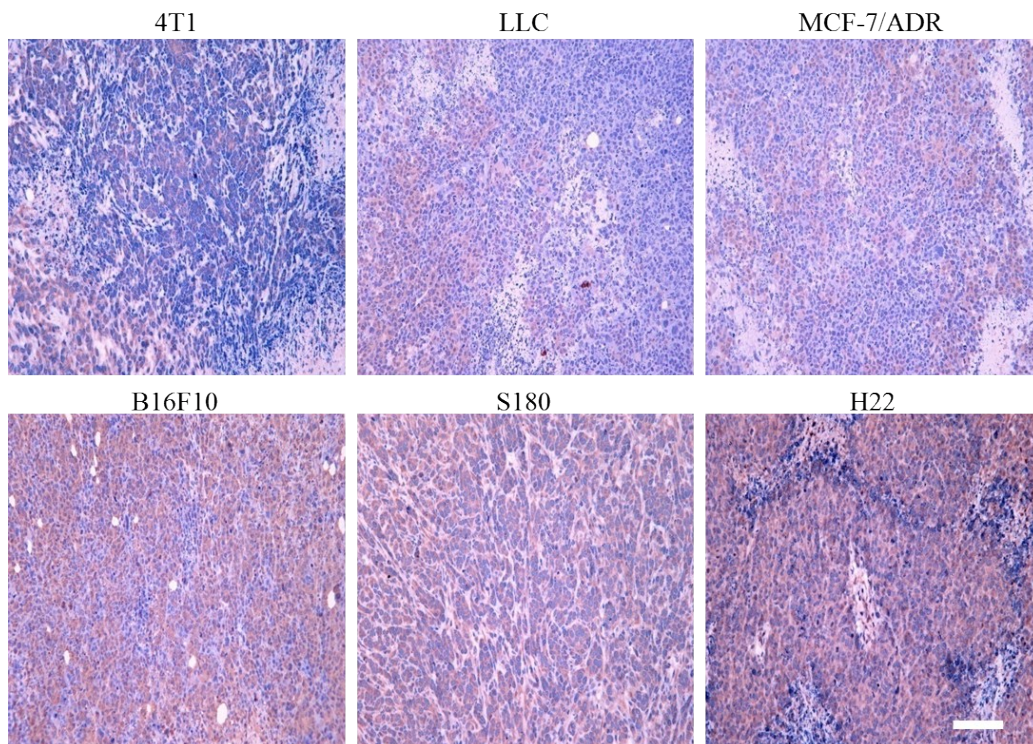

**Fig.S19** The expression levels of MMP9 in different tumors as analyzed by immunohistochemical section (scale bar for 200 μm).

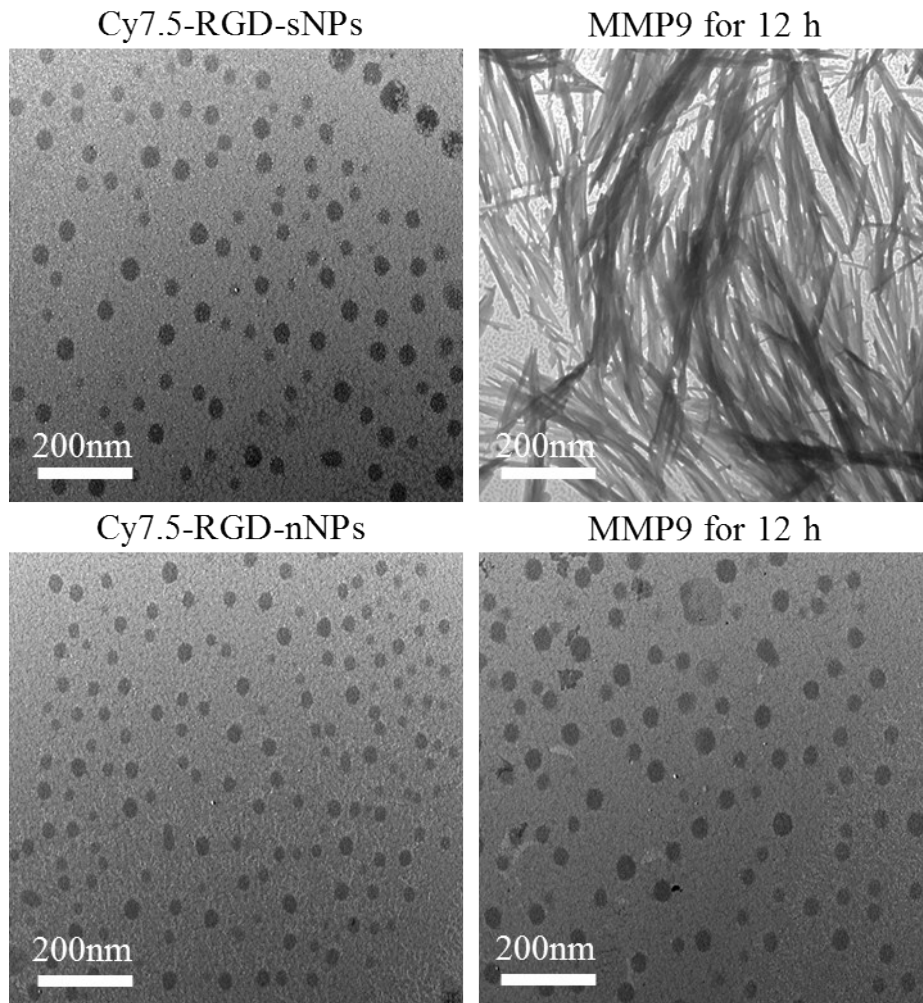

**Fig.S20** The TEM images of Cy7.5-RGD-sNPs and Cy7.5-RGD-nNPs with or without MMP9 treatment.

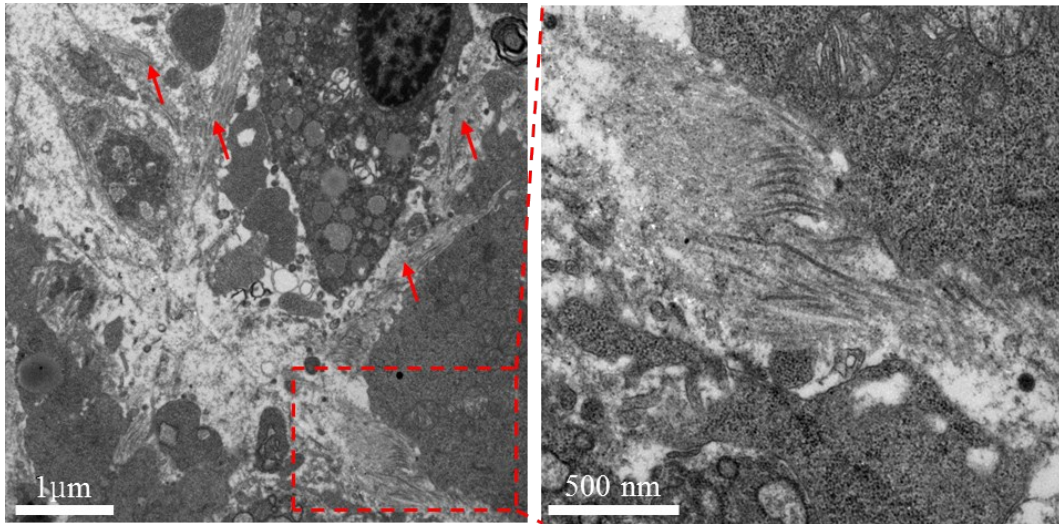

**Fig.S21** Bio-TEM of in situ formed nanofibers in tumor region (red arrows represent nanofibers formed in tumor).

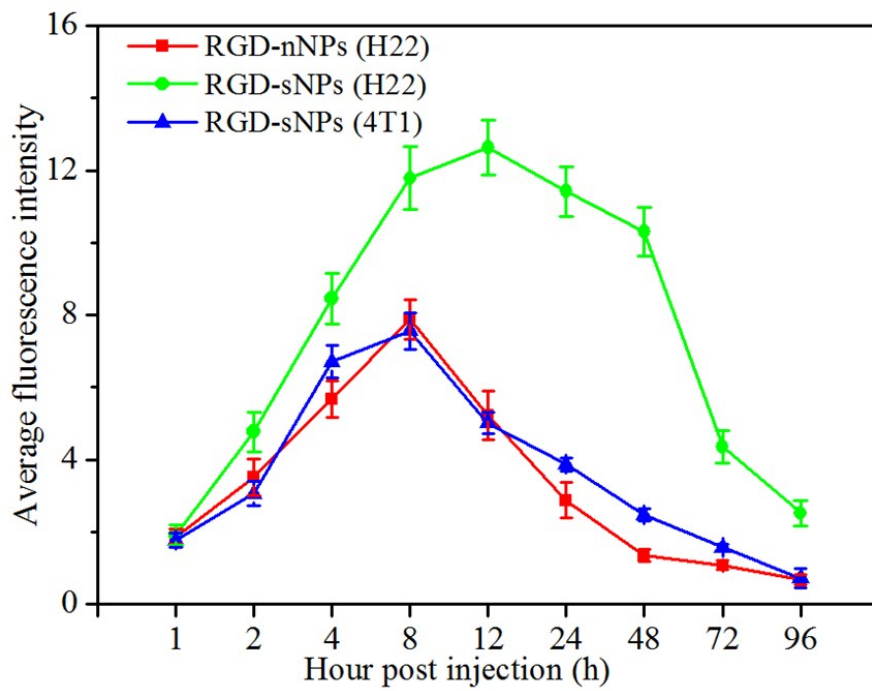

**Fig.S22** The average fluorescence intensity in tumor region at different time point (n=3).

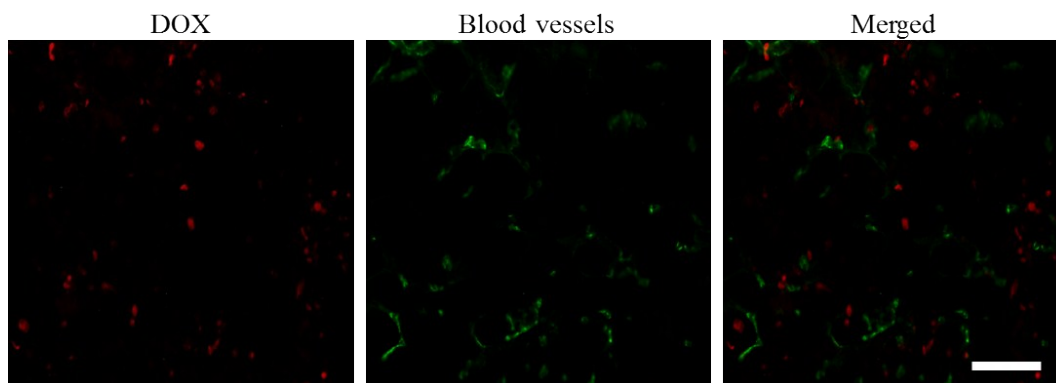

**Fig.S23** *In vivo* penetration of DOX extravasated from blood vessels after intravenous injection of DOX solution for 48 h at DOX dose of 2.5 mg/kg (scale bar for 100  $\mu$ m).

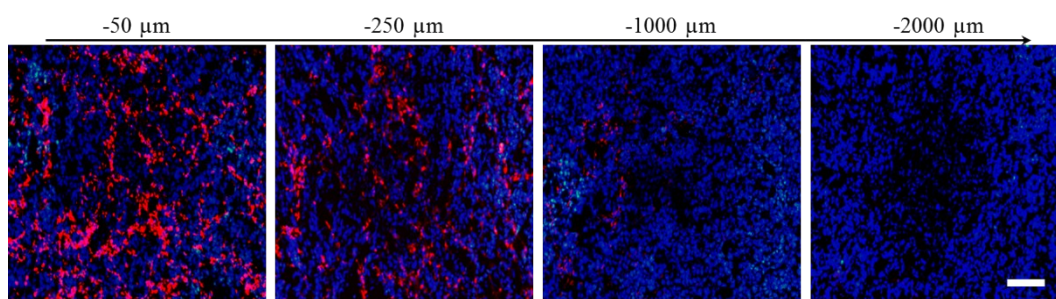

**Fig.S24** *In vivo* penetration of DOX in tumors after intratumoral administration of DOX solution at DOX dose of 2.5 mg/kg for 48 h (scale bar for 100  $\mu$ m). Frozen sections of tumors were sliced at different depths below the injection position.

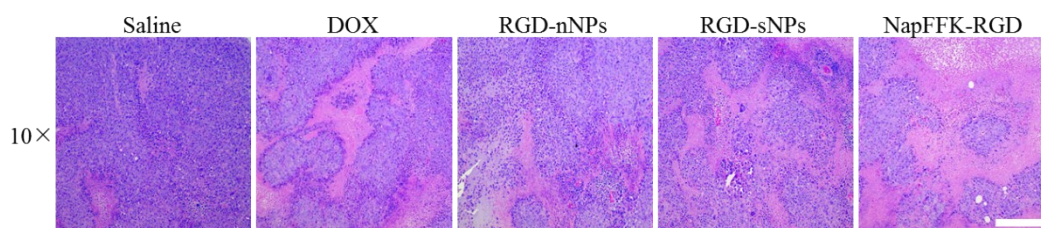

**Fig.S25** The images of H&E for tumors resected from H22 tumor-bearing mice (scale bar for 200  $\mu$ m).

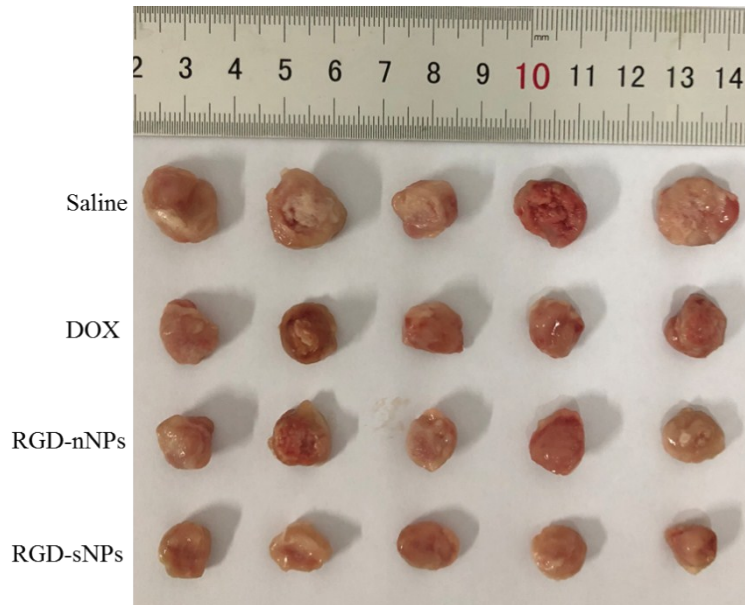

**Fig.S26** The image of tumors (5/8) collected from 4T1 tumor-bearing mice after last treatment. The other three were stored at  $-80\text{ }^{\circ}\text{C}$  after excision.

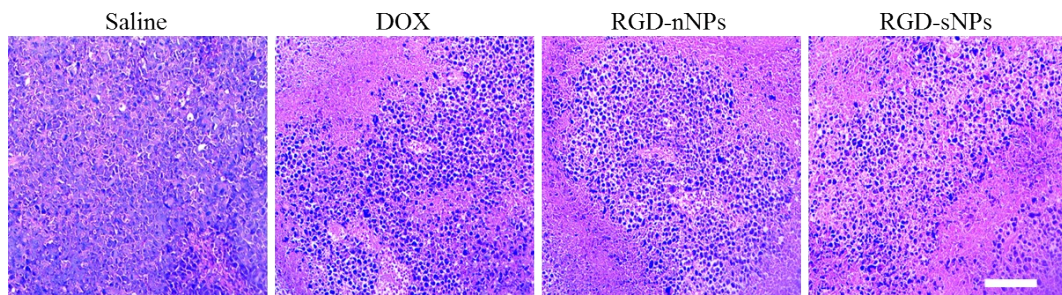

**Fig.S27** The images of H&E for tumors resected from 4T1 tumor-bearing mice (scale bar for  $100\text{ }\mu\text{m}$ ).

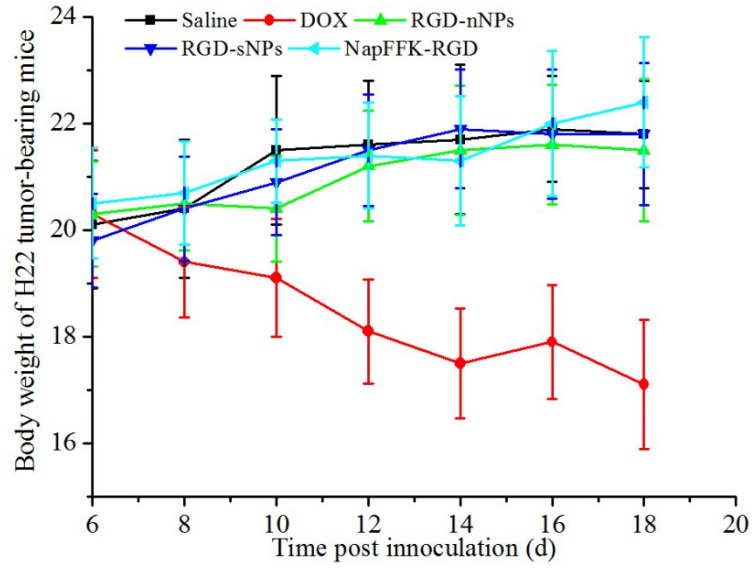

**Fig.S28** The body weight change of H22 tumor-bearing mice (n=8).

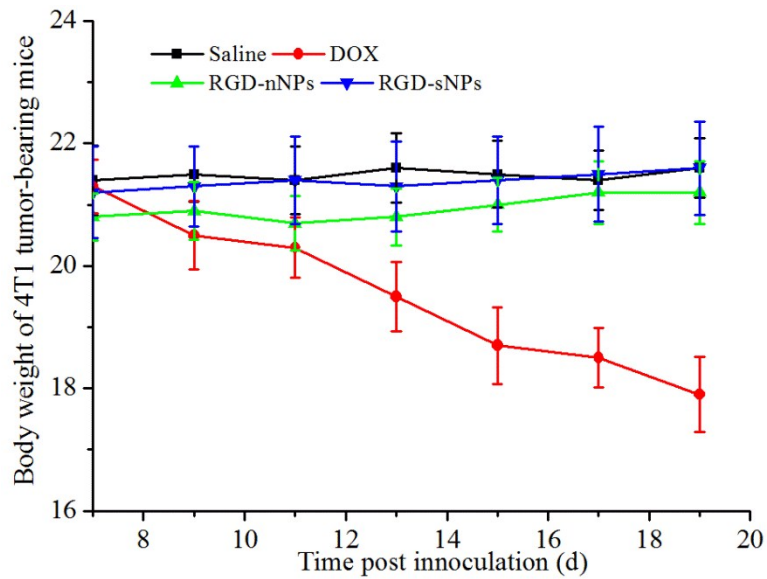

**Fig.S29** The body weight change of 4T1 tumor-bearing mice (n=8).



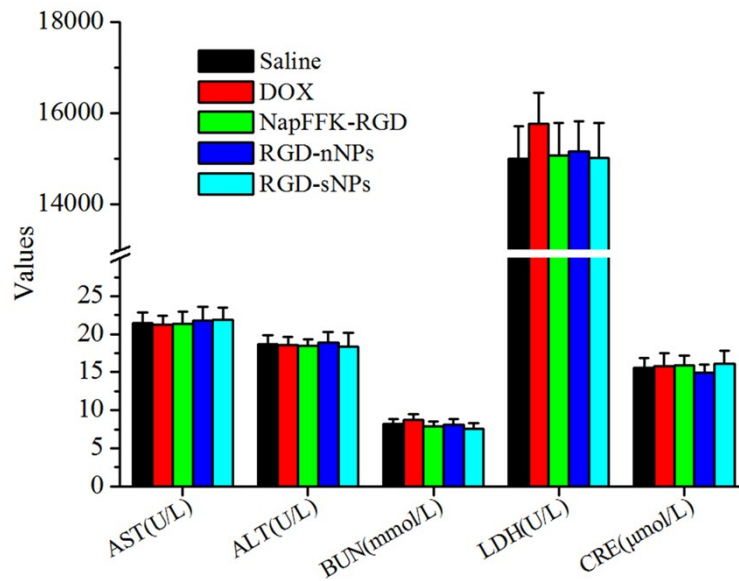

**Fig.S30** The hematologic and biochemical parameters of plasma from H22 tumor-bearing mice (n=8).

**Table S1** The IC<sub>50</sub> values against L929 cell line after 48 h treatment (n=6).

| Groups   | IC <sub>50</sub> values (μg/mL) <sup>a)</sup> |
|----------|-----------------------------------------------|
|          | L929                                          |
| RGD-nNPs | 504.25                                        |
| RGD-sNPs | 493.44                                        |

a) The half maximal inhibitory concentration.
